# Supplementary material
Source: publisher site journal article supplement (https://www.dovepress.com/article/536225)
Supplement: Supplementary file 1 [file 536225%20Supplementary%20Material_1.docx]

**On-line Supplementary Materials**

**Title: Effect of Ciprofol on postoperative cognitive function in patients undergoing cardiac surgery with cardiopulmonary**

**bypass: A prospective, randomized, controlled trial.**

| **Contents** | **Page** |
| --- | --- |
| - **Definition of intraoperative and postoperative complications.** | **2** |
| - **The detail approach of multiple-imputation.** | **4** |
| - **Supplementary Table S1. Intraoperative Data.** | **5** |
| - **Supplementary Figure S1. The intraoperative sedative anesthesia induction and maintenance regimens for the two groups of patients.** | **8** |
| - **Supplementary Figure S2. The occurrence of POD, relative risk and P-value for interaction in different subgroups.** | **9** |

**Definition of intraoperative and postoperative complications**

**1. Severe haemodynamic instability**

During non cardiopulmonary bypass (CPB) mean arterial pressure (MAP) remains below 60 mmHg despite high-dose inotropic and vasoconstrictor support (inotrope score >10), or hemodynamic instability necessitating extracorporeal membrane oxygenation (ECMO) support.

**2. Malignant arrhythmia**

During non-CPB ventricular fibrillation (VF), sustained ventricular tachycardia (VT), torsades de pointes (Tdp), pulseless electrical activity (PEA), asystole, or other malignant arrhythmias causing significant hemodynamic compromise occurring during the off-pump period.

**3. Postoperative pneumonia:** meets the following criteria:

1) Sputum culture positive.

2) Respiratory infection. Patient has received antibiotics for a suspected respiratory infection and met one or more of the following criteria: new or changed sputum, new or changed lung opacities, fever, white blood cell count > 12×109/L.

**4. Postoperative pleural effusion**

Chest radiograph demonstrating blunting of the costophrenic angle, loss of sharp silhouette of the ipsilateral hemidiaphragm in upright position, evidence of displacement of adjacent anatomical structures or (in supine position) a hazy opacity in one hemithorax with preserved vascular shadows.

**5. Postoperative acute kidney injury (AKI):** Defined using the creatinine component of the kidney disease: Improving Global Outcomes (KDIGO) criteria. Meets any of the following:

1) Increase in serum creatinine by ≥ 0.3 mg/dl (≥ 26.5 µmol/l) within 48 hours.

2) Increase in serum creatinine to ≥ 1.5 times baseline, which is known or presumed to have occurred within the prior 7 days.

3) Urine volume < 0.5 ml/kg/h for 6 hours.

**The detail approach of multiple-imputation.**

At 1 month postoperatively, a total of 5 patients (5/129, 3.88%) across both groups had missing T-MoCA assessment data, with 2 cases in the ciprofol group (2/64, 3.13%) and 3 cases in the propofol group (3/65, 4.62%). At 3 months postoperatively, 10 patients (10/129, 7.75%) had missing T-MoCA data, including 4 in the ciprofol group (4/64, 6.25%) and 6 in the propofol group (6/65, 9.23%).

Multiple imputation was performed for missing data using SPSS 27.0. Covariates incorporated into the imputation model included group allocation, age, sex, educational level, and preoperative MMSE score. A total of 20 imputed datasets were generated through 20 iterations of imputation for T-MoCA scores. The T-MoCA scores were then dichotomized into presence or absence of POCD (defined as POCD if T-MoCA score < 18). Chi-square tests were conducted to compare the incidence of POCD between the two groups in each imputed dataset, and the results of these tests were aggregated for final analysis.

**Supplementary Table S1. Intraoperative data.**

| **Characteristics** | **Total**  **(*n* = 129)** | **Group C**  **(*n* = 64)** | **Group P**  **(*n* = 65)** | ***P* value** |
| --- | --- | --- | --- | --- |
| Type of surgery, *n* (%) |  |  |  | 0.453 |
| Valve | 97 (75.19) | 52 (81.25) | 45 (69.23) |  |
| CABG | 19 (14.73) | 7 (10.94) | 12 (18.46) |  |
| Valve + CABG | 7 (5.43) | 3 (4.69) | 4 (6.15) |  |
| Other | 6 (4.65) | 2 (3.13) | 4 (6.15) |  |
| CPB duration, min, median (IQR) | 131.00 (101.00, 180.00) | 127.00 (96.50, 168.75) | 144.00 (102.50, 186.50) | 0.364 |
| CPB duration, *n* (%) |  |  |  | 0.801 |
| < 2h | 53 (41.09) | 27 (57.81) | 26 (40.00) |  |
| ≥ 2h | 76 (58.91) | 37 (57.81) | 39 (60.00) |  |
| Operation duration, min, median (IQR) | 270.00 (235.00, 325.00) | 265.00 (226.00, 318.75) | 290.00 (235.00, 330.00) | 0.242 |
| Operation duration, *n* (%) |  |  |  | 0.517 |
| < 4h | 35 (27.13) | 19 (70.31) | 16 (24.62) |  |
| ≥ 4h | 94 (72.87) | 45 (70.31) | 49 (75.38) |  |
| Crystal solution, ml, median (IQR) | 2093.00 (1593.50, 2459.50) | 2144.50 (1746.00, 2494.50) | 1955.00 (1523.00, 2405.00) | 0.116 |
| Autologous blood, ml, median (IQR) | 900.00 (700.00, 1000.00) | 900.00 (725.00, 1075.00) | 900.00 (700.00, 1000.00) | 0.575 |
| Bleeding volume, ml, median (IQR) | 500.00 (400.00, 500.00) | 500.00 (400.00, 500.00) | 500.00 (450.00, 500.00) | 0.524 |
| Urine volume, ml, median (IQR) | 1500.00 (1000.00, 2000.00) | 1500.00 (1200.00, 2000.00) | 1500.00 (950.00, 2000.00) | 0.520 |
| Red cells suspension, *n* (%) | 15 (11.63) | 11 (17.19) | 4 (6.15) | 0.093 |
| Plasma, *n* (%) | 34 (26.36) | 18 (28.13) | 16 (24.62) | 0.651 |
| Platelet concentrate, *n* (%) | 12 (9.30) | 5 (7.81) | 7 (10.77) | 0.783 |
| Cryoprecipitate, *n* (%) | 14 (10.85) | 7 (10.94) | 7 (10.77) | 0.975 |
| Dosage of perioperative anaesthetic  drugs |  |  |  |  |
| Ciprofol/Propofol, mL, median (IQR) | 141.30 (115.22, 172.10) | 141.00 (118.20, 166.43) | 142.80 (121.23, 182.50) | 0.343 |
| Midazolam, mg, median (IQR) | 7.00 (5.00, 9.00) | 7.50 (5.00, 9.00) | 7.00 (5.00, 9.50) | 0.962 |
| Sufentanil, ug, median (IQR) | 412.50 (358.13, 479.38) | 401.88 (352.50, 464.69) | 422.50 (362.50, 490.00) | 0.414 |
| Rocuronium, mg, median (IQR) | 80.00 (50.00, 100.00) | 80.00 (50.00, 100.00) | 80.00 (50.00, 100.00) | 0.796 |
| Dexmedetomidine, ug, median (IQR) | 25.50 (20.63, 31.45) | 24.5.00 (20.56, 30.75) | 26.50 (20.42, 32.25) | 0.381 |
| Drugs related to coagulation function |  |  |  |  |
| Heparin, mg, median (IQR) | 200.50 (170.00, 250.00) | 200.00 (162,50, 250.00) | 200.00 (175.00, 250.00) | 0.616 |
| Protamine, mg, median (IQR) | 380.00 (320.00, 405.00) | 380.00 (330.00, 400.00) | 360.00 (320.00, 415.00) | 0.802 |
| Dosage of cardiovascularactive drugs |  |  |  |  |
| Dopamine, mg, median (IQR) | 52.50 (27.30, 77.14) | 47.14 (24.97, 64.94) | 63.65 (29.17, 86.10) | 0.089 |
| Dobutamine, mg, median (IQR) | 52.50 (20.97, 77.14) | 47.14 (21.97, 65.89) | 63.65 (19.53, 86.10) | 0.194 |
| Adrenaline, mg, median (IQR) | 0.02 (0.00, 0.22) | 0.02 (0.00, 0.22) | 0.02 (0.01, 0.25) | 0.403 |
| Norepinephrine, mg, median (IQR) | 0.00 (0.00, 0.20) | 0.00 (0.00, 0.21) | 0.00 (0.00, 0.12) | 0.434 |
| Aramine, mg, median (IQR) | 0.00 (0.00, 0.30) | 0.05 (0.00, 0.30) | 0.00 (0.00, 0.30) | 0.152 |
| Total number of additions of cardiovascularactive drugs a,  time, median (IQR) |  |  |  |  |
| Positive b | 2 (1, 3) | 2 (1, 3) | 2 (1, 3) | 0.336 |
| Negative c | 2 (1, 4) | 0 (0, 1) | 0 (0, 0) | 0.396 |

**Notes:** Data presented as n (%) or median (quartile 1, quartile 3), unless otherwise indicated.

a Total number of additions of cardiovascularactive drugsindicates the total number of single additions of cardiovascular active drugs during non-cardiopulmonary bypass.

b Positive cardiovascularactive drugs indicate Atropine, Ephedrine, Aramine, Isprenaline and Adrenaline.

c Negative cardiovascularactive drug indicates Esmolol.

**Abbreviations:** CABG, Coronary artery bypass graft surgery; CPB, Cardiopulmonary bypass; IQR, Inter quartile range; COPD, Chronic Obstructive Pulmonary Disease.

**Supplementary Figure S1. The intraoperative sedative anesthesia induction and maintenance regimens for the two groups of patients.**


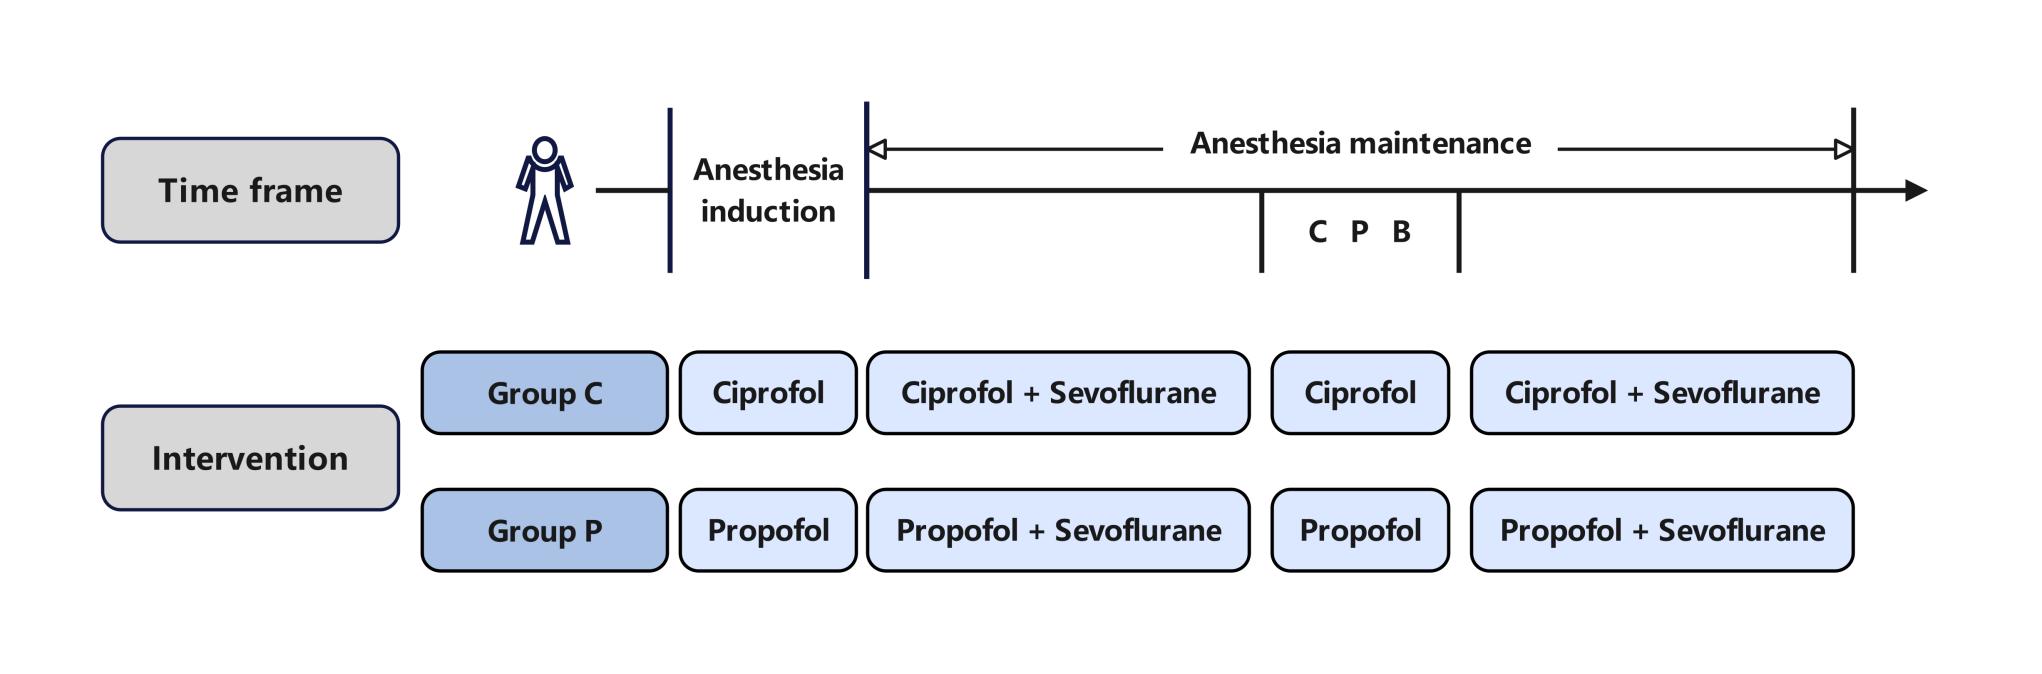


Abbreviations:CPB, Cardiopulmonary bypass.

**Supplementary Figure S2. The occurrence of POD, relative risk and P-value for interaction in different subgroups.**


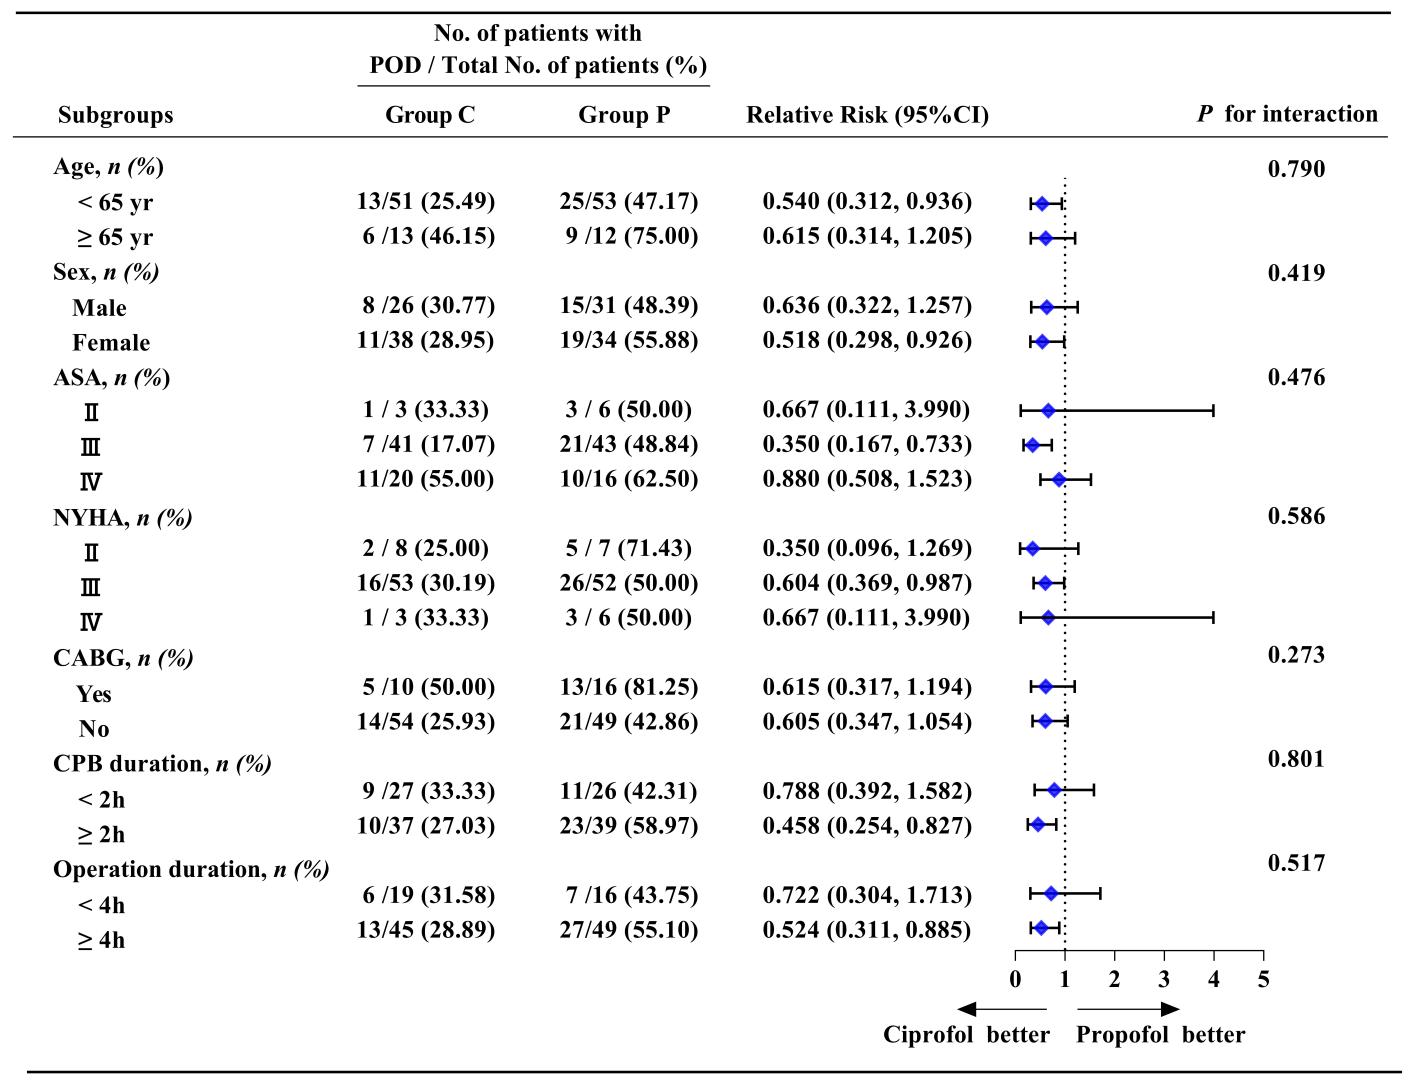


Abbreviations: POD, Postoperative delirium; ASA, American society anesthesiologists; NYHA, New York Heart Association Classiﬁcation; CABG, coronary artery bypass grafting; CPB, Cardiopulmonary bypass; CI, Cofident interval; *P*, P-value.
